# Supplementary material for: Impact of disability and selected factors on the quality of life in the elderly in southeastern Poland - a cross-sectional study
Source: Research Square preprint supplement (doi:10.21203/rs.3.rs-6311301/v1), 2025-05-14
Supplement: Supplementary file 1 [file 09fc0ea88f5f6f807ec2191b.docx]

Supplementary table – comparison of the structures of the studied sample and the population of Podkarpackie Voivodeship aged 65 and over

| Age structure whole grup | The studied sample | | Podkarpackie Voivodeship - data for 2023* | | Min. |
| --- | --- | --- | --- | --- | --- |
|  | n | % | n | % |
| 65-74 | 1 777 | 54.24% | 236 117 | 60.02% | 54.24% |
| 75-84 | 1 197 | 36.54% | 111 080 | 28.24% | 28.24% |
| 85 i więcej | 302 | 9.22% | 46 187 | 11.74% | 9.22% |
| Razem | 3 276 | 100.00% | 393 384 | 100.00% | **91.70%** |
| Female gender structure | The studied sample | | Podkarpackie Voivodeship - data for 2023* | | Min. |
| n | % | n | % |
| 65-74 | 1 081 | 51.82% | 130 046 | 56.08% | 51.82% |
| 75-84 | 794 | 38.06% | 68 917 | 29.72% | 29.72% |
| 85 i więcej | 211 | 10.12% | 32 911 | 14.19% | 10.12% |
| Razem | 2 086 | 100.00% | 231 874 | 100.00% | **91.66%** |
| Men | The studied sample | | Podkarpackie Voivodeship - data for 2023* | | Min. |
| n | % | n | % |
| 65-74 | 696 | 58.49% | 106 071 | 65.67% | 58.49% |
| 75-84 | 403 | 33.87% | 42 163 | 26.11% | 26.11% |
| 85 i więcej | 91 | 7.65% | 13 276 | 8.22% | 7.65% |
| Razem | 1 190 | 100.00% | 161 510 | 100.00% | **92.24%** |
|  |  |  |  |  |  |
| Structure by place of residence | The studied sample | | Podkarpackie Voivodeship - data for 2023* | | Min. |
|  | n | % | n | % |
| Miasto | 1 374 | 41.94% | 184 157 | 46.81% | 41.94% |
| Wieś | 1 902 | 58.06% | 209 227 | 53.19% | 53.19% |
| Razem | 3 276 | 100.00% | 393 384 | 100.00% | **95.13%** |

**Statistical data for the Podkarpackie Voivodeship were obtained from the official website of the Central Statistical Office https://bdl.stat.gov.pl/bdl/start (GUS - Local Data Bank).*

In order to compare the structure of the studied sample in terms of division into age categories (including division by gender) and place of residence, structure similarity indices were determined. The obtained results indicate a very high similarity of the structure of the studied population to the structure of the 65+ population in the Podkarpackie Voivodeship.
